# Supplementary material for: LIFUS-Driven Engineered Bacteria Reprogram Immunosuppressive Niches via Mechano-NOTCH Signaling
Source: Research Square preprint supplement (doi:10.21203/rs.3.rs-6644974/v1), 2025-05-26

**LIFUS-Driven Engineered Bacteria Reprogram Immunosuppressive Niches via Mechano-NOTCH Signaling**

**Lizhou Lin, Xiao Li, Xiaolong Li, Wenyun Guo, Xin Guan, HaoHao Yi*, Huixiong Xu***

**Department of Ultrasound, Institute of Ultrasound in Medicine and Engineering, Zhongshan Hospital, Fudan University, Shanghai 200032, P. R. China**

**Supplementary Figures**

***S1*. The characterization and safety assessment of engineer bacteria.**


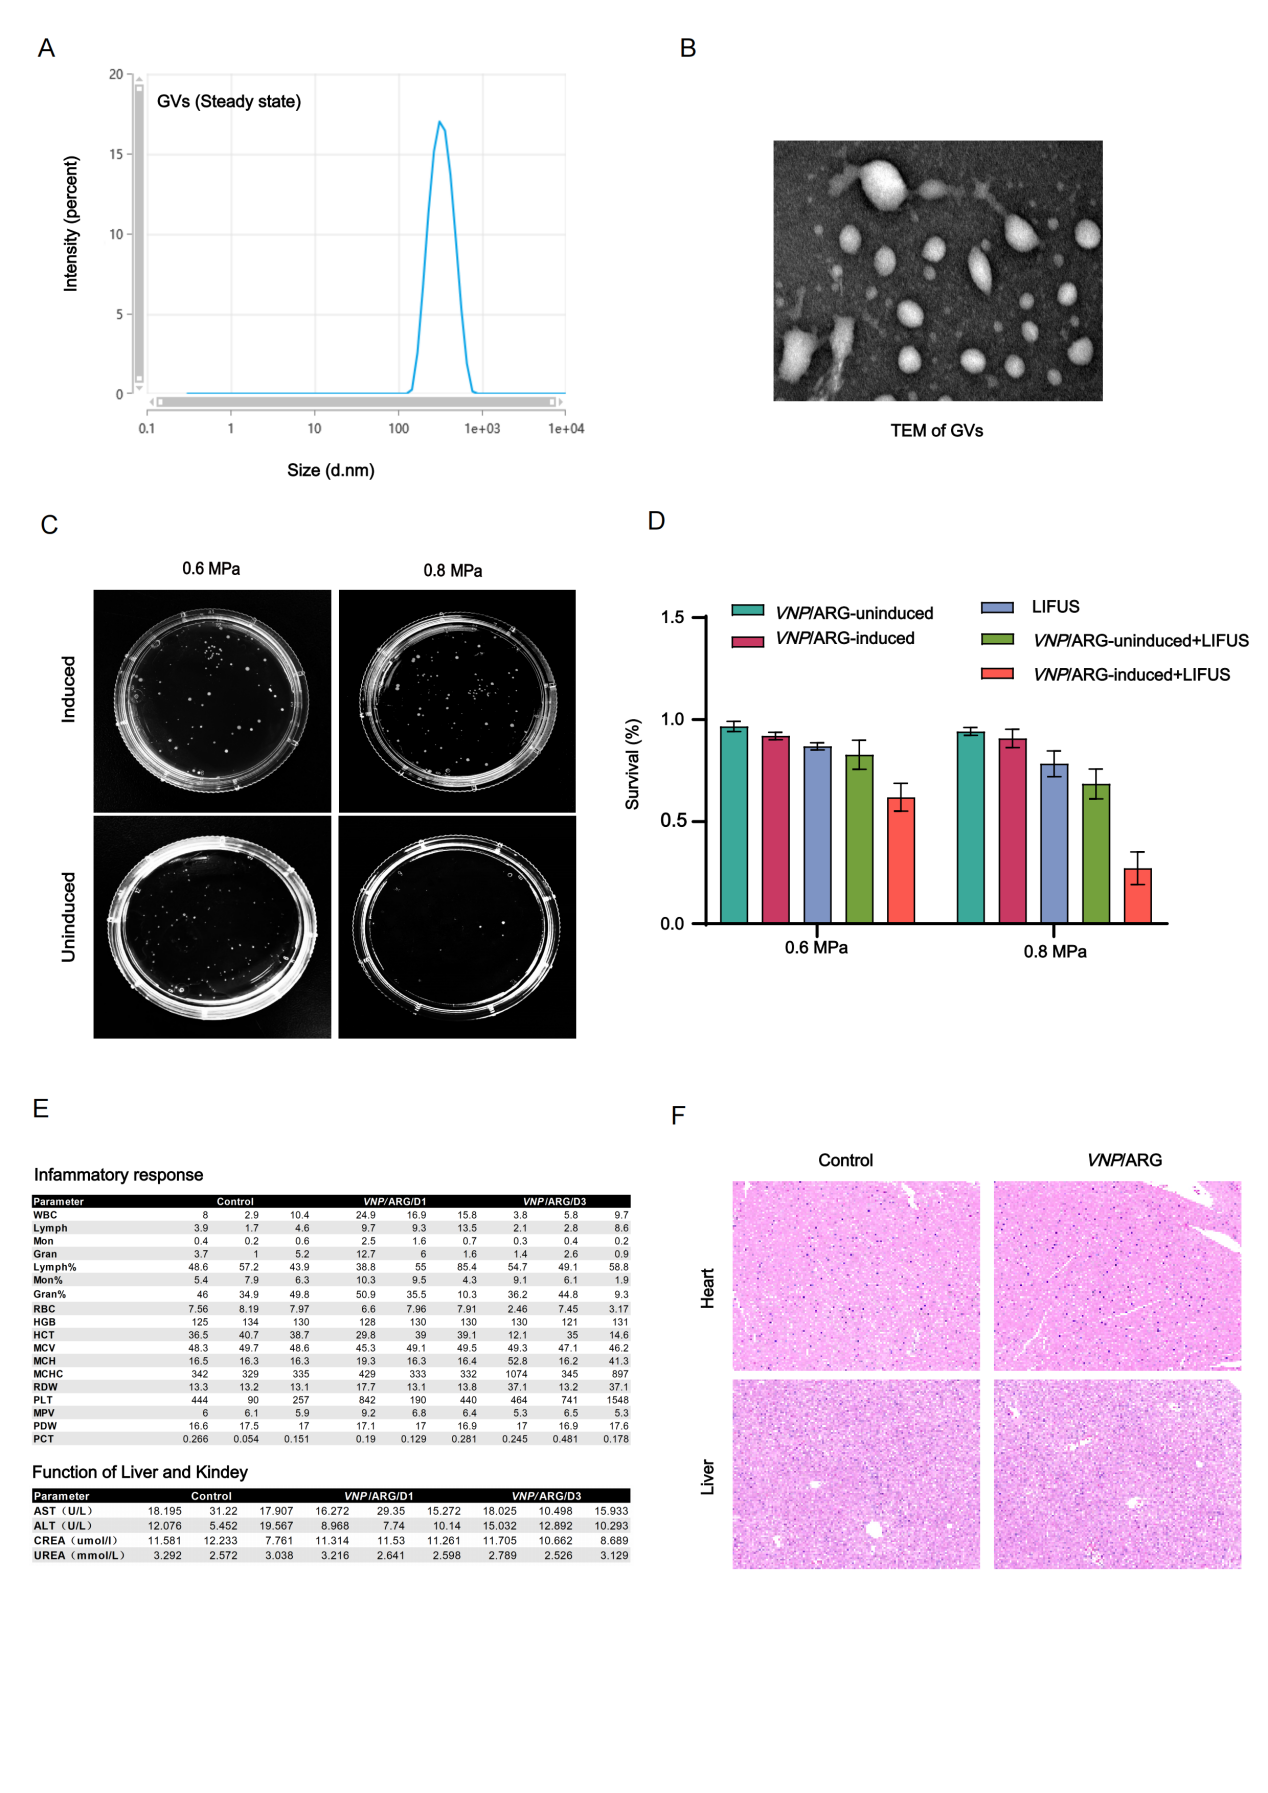


***S2.* A.Comparison of tumor apoptosis among different groups**

**B.The immunohistochemistry image of collagen I**


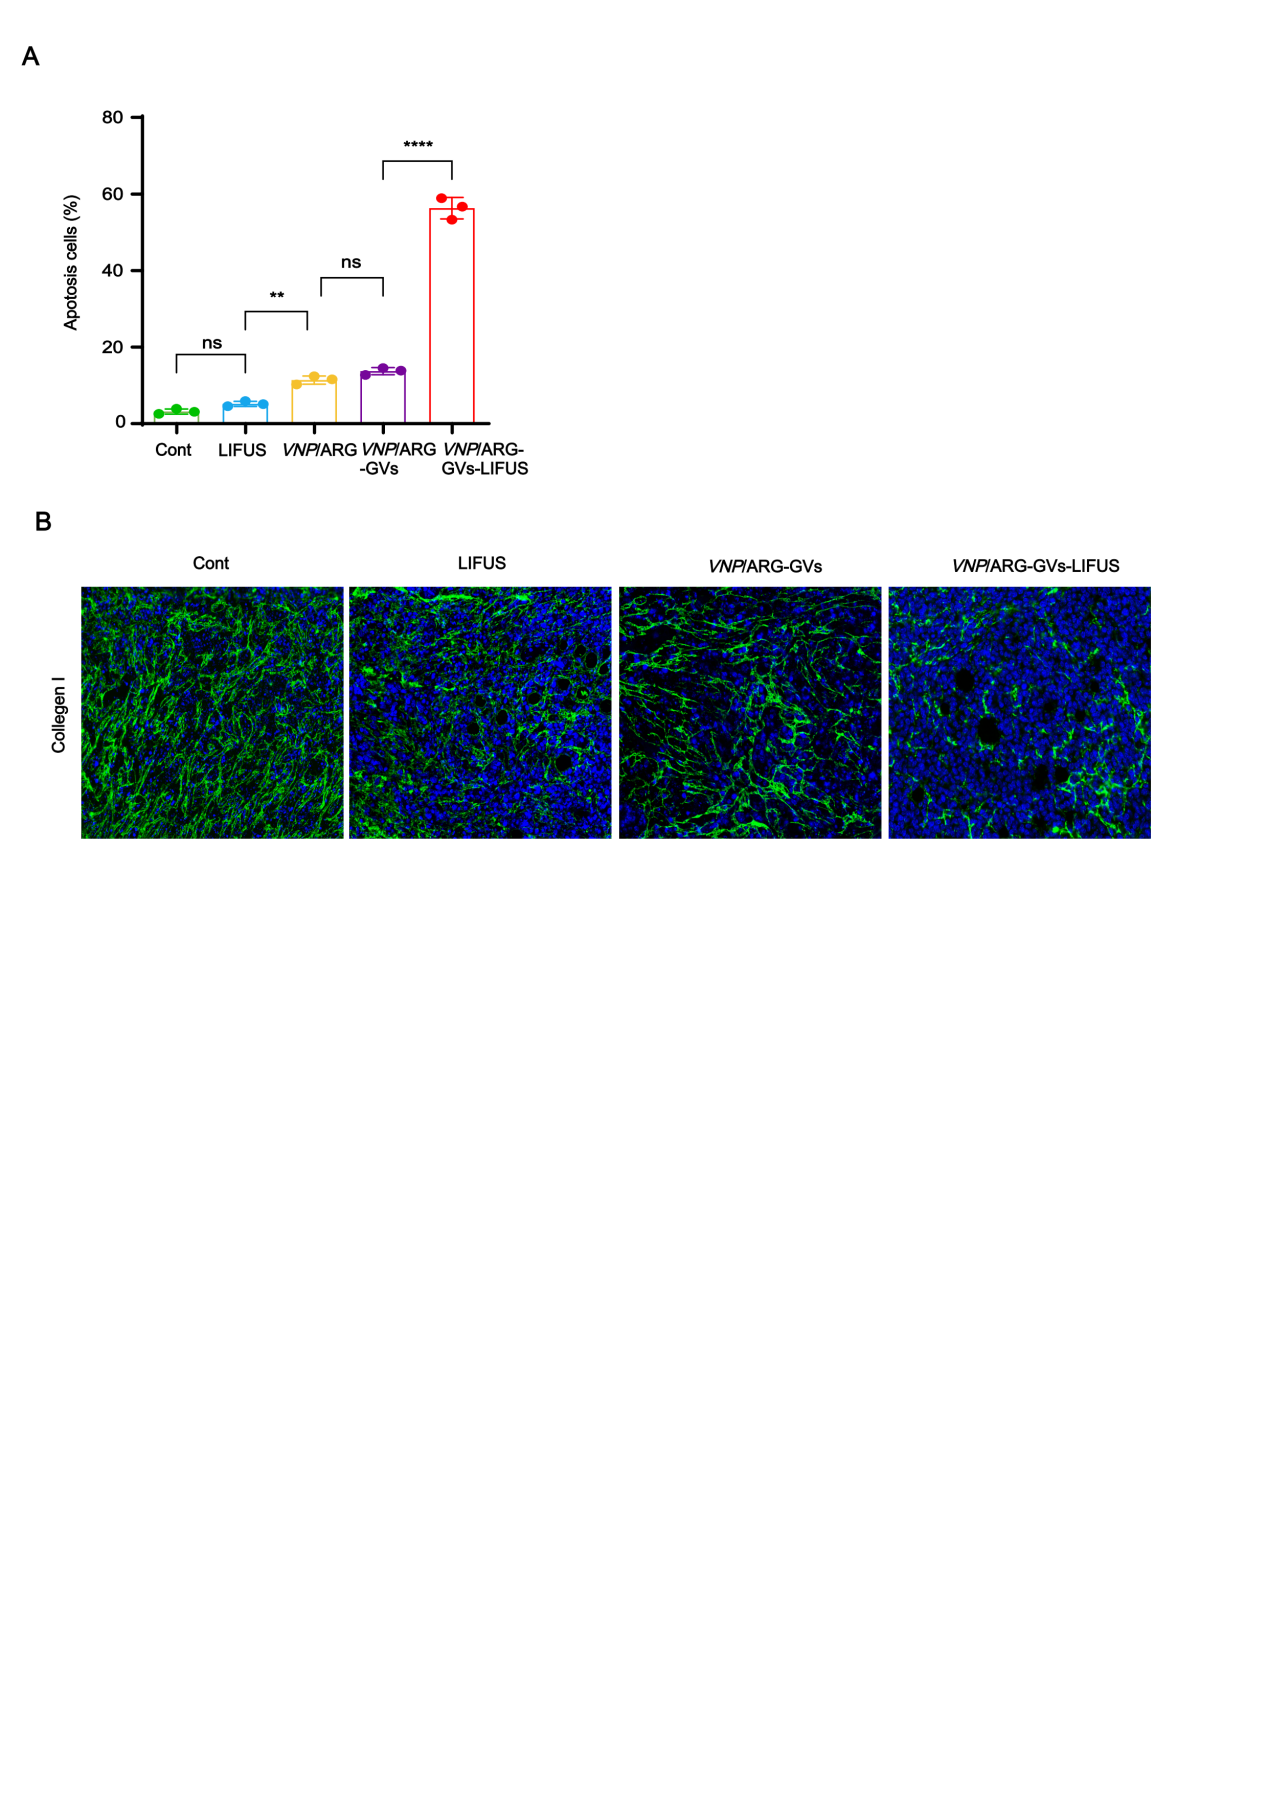


***S3.* The functional analyze of Cd8t_02 cluster (A-B) and Cd8t_04 cluster (C)**


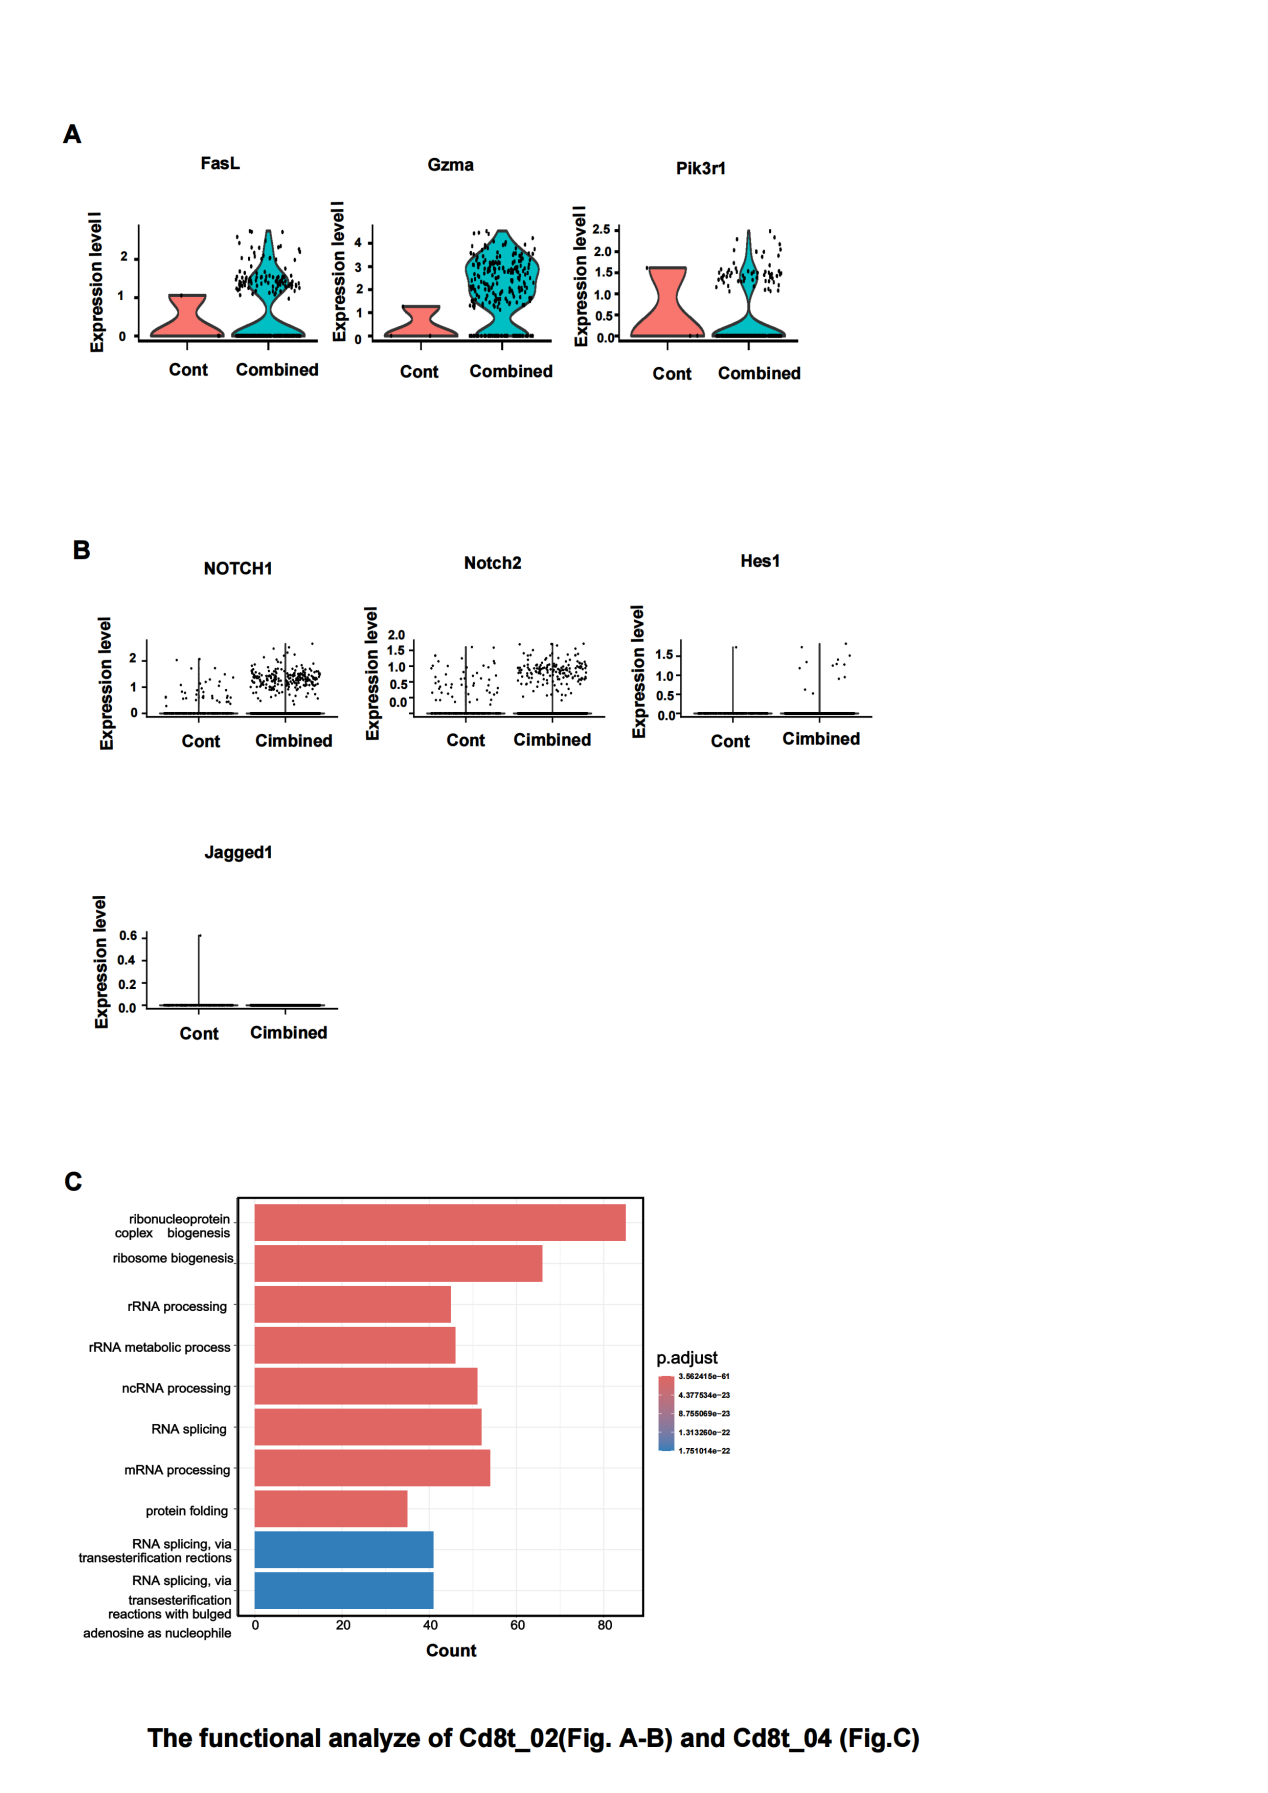


***S4.* The function validation of CD8+ T with or without LIFUS-GVs**


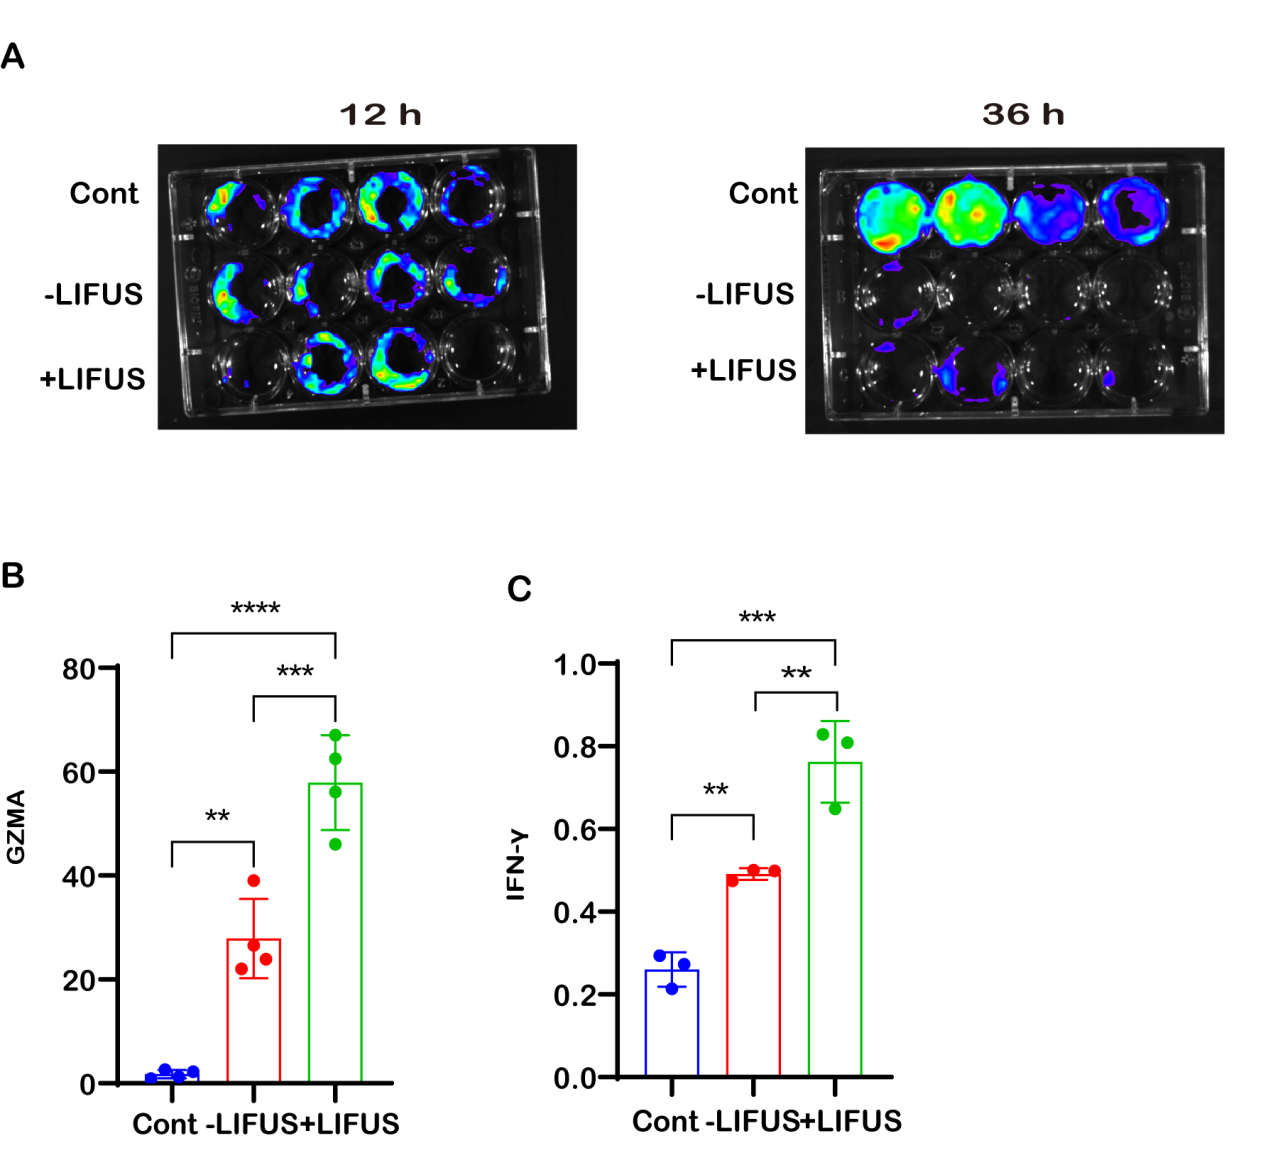

Supplement: Supplementary file 1 [file d6caa93aafe46e5b8dce2ece.docx]
